1           **High-throughput detection of antibodies targeting the SARS-CoV-2 Spike in**  
2                                           **longitudinal convalescent plasma samples**

3 Sai Priya Anand<sup>1,2,5</sup>, Jérémie Prévost<sup>1,3,5</sup>, Jonathan Richard<sup>1,3,5</sup>, Josée Perreault<sup>4</sup>, Tony  
4 Tremblay<sup>4</sup>, Mathieu Drouin<sup>4</sup>, Marie-Josée Fournier<sup>4</sup>, Antoine Lewin<sup>4</sup>, Renée Bazin<sup>4</sup> and Andrés  
5 Finzi<sup>1,2,3,#</sup>

6 <sup>1</sup>Centre de Recherche du CHUM, Montréal, QC, Canada

7 <sup>2</sup>Department of Microbiology and Immunology, McGill University, Montréal, QC, Canada

8 <sup>3</sup>Département de Microbiologie, Infectiologie et Immunologie, Université de Montréal, Montréal,  
9 QC, Canada

10 <sup>4</sup>Héma-Québec, Affaires Médicales et Innovation, Québec City / Montréal, QC, Canada

11 <sup>5</sup>Contributed equally

12 # Correspondence: [andres.finzi@umontreal.ca](mailto:andres.finzi@umontreal.ca)

13 **Abstract**

14 **Background:** The SARS-CoV-2 virus is the cause of the ongoing coronavirus disease 2019  
15 (COVID-19) pandemic, infecting millions of people and causing more than a million deaths. The  
16 SARS-CoV-2 Spike glycoproteins mediate viral entry and represent the main target for antibody  
17 responses. Humoral responses were shown to be important for preventing and controlling  
18 infection by coronaviruses. A promising approach to reduce the severity of COVID-19 is the  
19 transfusion of convalescent plasma. However, longitudinal studies revealed that the level of  
20 antibodies targeting the receptor-binding domain (RBD) of the SARS-CoV-2 Spike declines  
21 rapidly after the resolution of the infection.

22 **Study Design and Methods:** To extend this observation beyond the RBD domain, we performed  
23 a longitudinal analysis of the persistence of antibodies targeting the full-length SARS-CoV-2 Spike  
24 in the plasma from 15 convalescent donors. We generated a 293T cell line constitutively  
25 expressing the SARS-CoV-2 Spike and used it to develop a high-throughput flow cytometry-based  
26 assay to detect SARS-CoV-2 Spike specific antibodies in the plasma of convalescent donors.

27 **Results and Conclusion:** We found that the level of antibodies targeting the full-length SARS-  
28 CoV-2 Spike declines gradually after the resolution of the infection. This decline was not related  
29 to the number of donations, but strongly correlated with the decline of RBD-specific antibodies  
30 and the number of days post-symptom onset. These findings help to better understand the decline  
31 of humoral responses against the SARS-CoV-2 Spike and provide important information on when  
32 to collect plasma after recovery from active infection for convalescent plasma transfusion.

## 33 **Introduction**

34 The ongoing coronavirus disease 2019 (COVID-19) pandemic is caused by the severe acute  
35 respiratory syndrome coronavirus 2 (SARS-CoV-2) and as of October 2020, has caused over a  
36 million deaths worldwide (<https://www.worldometers.info/coronavirus/>). The transfusion of  
37 convalescent plasma for the treatment of respiratory infections caused by coronaviruses, such as  
38 SARS-CoV-1, has been successful to improve patient outcome <sup>1</sup>. Its use has now been initiated  
39 as an adjunctive therapy for patients with COVID-19 and several clinical trials are underway (for  
40 example NCT04412486 and NCT04342182). Preliminary findings have suggested improvements  
41 in the patients' clinical status after convalescent plasma treatment <sup>2-5</sup>.

42 Currently, the dynamics of the humoral response against SARS-CoV-2 are under investigation.  
43 Of importance is the highly immunogenic trimeric Spike (S) glycoprotein, which is the target of  
44 neutralizing antibodies (Abs) and facilitates SARS-CoV-2 entry into host cells via its receptor-  
45 binding domain (RBD) that interacts with angiotensin-converting enzyme 2 (ACE-2) <sup>6,7</sup>. The  
46 neutralization activity of plasma from convalescent donors has been suggested to be important  
47 for clinical improvement and is a factor of consideration in screening convalescent plasma <sup>2,3,8,9</sup>.  
48 However, several studies have shown that antibody titers and neutralization activity against S,  
49 including RBD-specific Abs, decrease during the first weeks after resolution of infection <sup>10-12</sup>.  
50 Furthermore, despite most neutralizing Abs being RBD-specific <sup>12-14</sup>, studies have isolated potent  
51 neutralizing Abs that are specific to other epitopes on the S trimer, mainly directed against the N-  
52 terminal domain of the S1 subunit (NTD) <sup>15</sup>. Additionally, the bulk of the antibody responses  
53 elicited by SARS-CoV-2 infection were found to target two major immunodominant regions on the  
54 S protein, such as the fusion peptide region and heptad repeat 2 (HR2) of the S2 subunit <sup>16,17</sup>.  
55 Thus, current plasma screening processes using only recombinant RBD to determine  
56 seropositivity and antibody titers for convalescent plasma therapy could overlook antibodies  
57 specific to multiple epitopes on the viral spike. Here we have developed a high-throughput flow-  
58 cytometry assay that is based on the recognition of the full-length SARS-CoV-2 S protein

59 expressed on the surface of 293T cells. This method allows for the detection of antibodies binding  
60 to various conformations and domains of the Spike. We used this method to screen longitudinal  
61 convalescent plasma samples from 15 donors to determine the antibody response to the full Spike  
62 over time.

63

## 64 **Material and Methods**

### 65 **Convalescent plasma donors**

66 Recovered COVID-19 patients were recruited mostly following self-identification and through  
67 social media. All participants have received a diagnosis of COVID-19 by the Québec Provincial  
68 Health Authority and met the donor selection criteria for plasma donation in use at Héma-Québec.  
69 They donated plasma at least 14 days after complete resolution of COVID-19 symptoms. Males  
70 and females with no history of pregnancy meeting the above criteria were invited to donate  
71 plasma, after informed consent. A volume of 500 mL to 750 mL of plasma was collected by  
72 plasmapheresis (TRIMA Accel®, Terumo BCT). Seropositive donors donated additional plasma  
73 units every six days, for a maximum of 12 weeks. All work was conducted in accordance with the  
74 Declaration of Helsinki in terms of informed consent and approval by an appropriate institutional  
75 board. Convalescent plasmas were obtained from donors who consented to participate in this  
76 research project at Héma-Québec (REB # 2020-004).

77

### 78 **Transfection and transduction of 293T cells**

79 293T human embryonic kidney cells (obtained from ATCC) were maintained at 37°C under 5%  
80 CO<sub>2</sub> in Dulbecco's modified Eagle's medium (DMEM) (Wisent) containing 5% fetal bovine serum  
81 (VWR) and 100 µg/ml of penicillin-streptomycin (Wisent). The plasmid expressing the full-length  
82 SARS-CoV-2 Spike was kindly provided by Stefan Pöhlmann and was previously reported <sup>7</sup>. 293T  
83 cells were transfected with 10 µg of Spike expressor and 2 µg of a green fluorescent protein (GFP)  
84 expressor (pIRES-GFP) for 2×10<sup>6</sup> 293T cells using the standard calcium phosphate method. For

85 the generation of 293T cells stably expressing the SARS-CoV-2 Spike protein, transgenic  
86 lentiviruses were produced in 293T using a third-generation lentiviral vector system. Briefly, 293T  
87 cells were co-transfected with two packaging plasmids (pLP1 and pLP2), an envelope plasmid  
88 (pSVCMV-IN-VSV-G) and a lentiviral transfer plasmid coding for a GFP-tagged SARS-CoV-2  
89 Spike (pLV-SARS-CoV-2 S C-GFPspark tag) (Sino Biological). Supernatant containing lentiviral  
90 particles was used to transduce more 293T cells in presence of 5µg/mL polybrene. The 293T  
91 cells stably expressing SARS-CoV-2 Spike (GFP+) were sorted by flow cytometry.

92

### 93 **Cell surface staining and flow cytometry analysis**

94 293T cells transfected with a Spike expressor or 293T-Spike cells were stained with the anti-RBD  
95 CR3022 monoclonal Ab (5 µg/ml) or plasma (1:250 dilution). AlexaFluor-647-conjugated goat  
96 anti-human IgG (H+L) Abs (Invitrogen) were used as secondary antibodies. The percentage of  
97 transfected/transduced cells (GFP+ cells) was determined by gating the living cell population  
98 based on viability dye staining (Aqua Vivid, Invitrogen). Samples were acquired on a LSRII  
99 cytometer (BD Biosciences) and data analysis was performed using FlowJo v10.5.3 (Tree Star).  
100 The seropositivity threshold was established using the following formula: (mean of all COVID-19  
101 negative plasma + (3 standard deviation of the mean of all COVID-19 negative plasma) + inter-  
102 assay coefficient of variability).

103

### 104 **Statistical analyses**

105 Statistics were analyzed using GraphPad Prism version 8.4.3 (GraphPad, San Diego, CA). Every  
106 dataset was tested for statistical normality and this information was used to apply the appropriate  
107 (parametric or nonparametric) statistical test. P values < 0.05 were considered significant;  
108 significance values are indicated as \* p < 0.05, \*\* p < 0.01, \*\*\* p < 0.001, \*\*\*\* p < 0.0001.

## 109 **Results**

### 110 **Generation and characterization of a 293T-Spike cell line**

111 To develop a high-throughput flow cytometry assay able to detect anti-SARS-CoV-2 S antibodies  
112 in plasma from convalescent donors, we generated a cell line stably expressing the full-length S  
113 glycoprotein. Third-generation transgenic lentiviruses encoding for SARS-CoV-2 S were used to  
114 transduce 293T cells. Since the S glycoprotein is fused to a C-terminal GFP tag, 293T-Spike cells  
115 were sorted by flow cytometry based on GFP expression. The presence of cell-surface S was  
116 confirmed using the anti-RBD CR3022 monoclonal Ab and plasma from SARS-CoV-2 infected  
117 individuals. Specificity was confirmed using pre-pandemic healthy donor plasma (Figure 1A). For  
118 our high-throughput flow cytometry-based assay, parental 293T and 293T-Spike cells were mixed  
119 at an equal ratio and incubated with plasma from convalescent donors. Spike-specific antibodies  
120 were detected by adding a fluorescent anti-human IgG (H+L) secondary antibody. The signal was  
121 measured by flow cytometry and background signal measured on parental 293T cells (GFP  
122 negative) was subtracted for specificity. Signal obtained with plasma from 10 COVID-19 negative  
123 donors were used to define a limit of detection for seropositivity (Figure 1B, C).

124

### 125 **Longitudinal decline of Spike-specific antibodies in plasma from convalescent donors**

126 Recently, a longitudinal analysis was performed to measure the RBD-specific antibody response  
127 in convalescent plasma from 33 to 114 days post-symptom onset using a semi-quantitative ELISA  
128 <sup>18</sup>. This cohort consisted of 11 males and 4 females (median age of 56 years old) and plasma was  
129 donated at least 4 times. A decrease in RBD-specific antibody titers between the first and last  
130 donations was observed for all 15 donors tested and this decline was shown to depend on time  
131 post-recovery but not on the number of donations. To extend this observation beyond the RBD  
132 domain, we used our high-throughput flow-cytometry based assay using the 293T-Spike cells to  
133 measure the persistence of antibodies targeting the full-length SARS-CoV-2 Spike in these  
134 convalescent plasma samples. Antibodies against S also decreased over time in these plasma

135 samples, with the decrease being significant ~74 days post-symptom onset onwards (Figure 2A).  
136 This finding was corroborated using a previously characterized flow-cytometry method to quantify  
137 SARS-CoV-2 Spike-specific antibodies using 293T cells transiently transfected with a plasmid  
138 encoding the full-length Spike<sup>10,11,19-21</sup> (Figure 2B), and the MFI obtained from both these methods  
139 correlated significantly ( $r = 0.9207$ ,  $p < 0.0001$ ) (Figure 2C). Results obtained with both flow  
140 cytometry assays, using transduced or transfected 293T cells, also positively correlated with the  
141 levels of RBD-specific antibodies as quantified by ELISA in the recently published study using the  
142 same cohort<sup>18</sup> (Figure 2C). Of note, the decline of total anti-Spike antibodies did not correlate  
143 with the number of donations ( $r = 0.1379$ ,  $p = 0.6217$ ) but rather correlated with the time elapsed  
144 between onset of symptoms and last donation ( $r = 0.5645$ ,  $p = 0.0284$ ) (Figure 2D).

145

## 146 **Discussion**

147 There are many serodiagnosis platforms that have recently been approved for emergency use  
148 authorization (EUA) by the U.S Food and Drug Administration (FDA). In this study, we developed  
149 a high-throughput flow-cytometry based serodiagnosis tool by developing a cell line stably  
150 expressing the SARS-CoV-2 Spike to screen for anti-Spike antibodies in plasma of COVID-19  
151 patients. Although our study shows data with plasma from only 15 donors, this assay can be  
152 readily adapted to a large-scale plasma screening with a high-throughput screening (HTS) plate  
153 reader for flow cytometry. In addition, we also expanded on recent findings showing a decrease  
154 in RBD-specific antibodies in convalescent plasma over time by showing that the level of  
155 antibodies targeting the full-length SARS-CoV-2 Spike also declines gradually after resolution of  
156 infection. These findings help to better understand the decline of humoral responses against the  
157 SARS-CoV-2 Spike and suggest that plasma should be collected rapidly after recovery from  
158 active infection in order to keep high levels of anti-Spike antibodies which are supposed to provide  
159 a clinical benefit in convalescent plasma transfer.

160 **Acknowledgements**

161 The authors thank the CRCHUM Flow Cytometry Platform for technical assistance. The authors  
162 are grateful to the convalescent plasma donors who participated in this study and the Héma-  
163 Québec team involved in convalescent donor recruitment and plasma collection. We thank Dr.  
164 Stefan Pöhlmann (Georg-August University, Germany) for the plasmid coding SARS-CoV-2 S  
165 glycoproteins and Dr. M. Gordon Joyce (U.S. MHRP) for the monoclonal antibody CR3022. Figure  
166 1B was prepared using images from Servier Medical Art by Servier, which is licensed under a  
167 Creative Commons Attribution 3.0 Unported License. This work was supported by le Ministère de  
168 l'Économie et de l'Innovation du Québec, Programme de soutien aux organismes de recherche  
169 et d'innovation to A.F. and by the Fondation du CHUM. This work was also supported by Canada's  
170 COVID-19 Immunity Task Force (CITF), in collaboration with the Canadian Institutes of Health  
171 Research (CIHR) and a CIHR foundation grant #352417 to A.F. A.F. is the recipient of Canada  
172 Research Chair on Retroviral Entry no. RCHS0235 950-232424. S.P.A and J. Prévost are  
173 supported by CIHR fellowships. The funders had no role in study design, data collection and  
174 analysis, decision to publish, or preparation of the manuscript.

175

176 **Declaration of Interests**

177 The authors declare no competing interests.



178 **Figure Captions**

179 **Figure 1. Characterization of the 293T-Spike cell line.**

180 (A) Dot plots depicting representative stainings of the parental 293T (left) or the 293T-Spike cell  
181 lines (right) using CR3022 mAb, a representative COVID-19 negative and COVID-19 positive  
182 plasma. Percentages represent the proportion of GFP+ and GFP- cells on the total cell population.  
183 (B) A schematic representation of the experimental procedures used to perform high-throughput  
184 screening (HTS) of plasma samples for their specific binding to SARS-CoV-2 Spike. (C) Dot plots  
185 depicting representative staining of pooled cell lines used for HTS assay (equal ratio of parental  
186 293T (GFP-) and the 293T-Spike cells (GFP+)) using CR3022 mAb, a COVID-19 negative plasma  
187 and a COVID-19 positive plasma. Median fluorescence intensities (MFI) obtained on GFP- and  
188 GFP+ cell populations are indicated.

189

190 **Figure 2. Decline of Spike-specific antibodies in longitudinal convalescent plasma.**

191 The level of anti-Spike antibodies in plasma from COVID+ donors was determined by flow  
192 cytometry using (A) 293T transduced cells or (B) 293T transfected cells expressing SARS-CoV-  
193 2 Spike. (A-B, left panels) Each curve represents the median fluorescence intensity (MFI)  
194 obtained with the plasma of one donor at every donation (4 to 10 donations per donor) as a  
195 function of the days after symptom onset. Undetectable measures are represented as white  
196 symbols, and limits of detection are plotted. (A-B, right panels) The time post-symptom onset (33-  
197 120 days) was divided in quartiles containing similar numbers (between 21 and 23) of plasma  
198 samples obtained from the 15 COVID-19 positive donors. Boxes and horizontal bars denote  
199 interquartile range (IQR) while horizontal line in boxes correspond to median of MFI values.  
200 Whisker endpoints are equal to the maximum and minimum values below or above the median  
201  $\pm 1.5$  times the IQR. Statistical significance was tested using one-way ANOVA with a Holm-Sidak  
202 post-test (\*  $P < 0.05$ ; \*\*  $P < 0.01$ ; \*\*\*\*  $P < 0.0001$ ). (C) Correlations between the levels of  
203 recognition of SARS-CoV-2 full-length Spike evaluated by flow cytometry using transduced or

204 transfected 293T cells and levels of RBD recognition of SARS-CoV-2 RBD evaluated by indirect  
205 ELISA. (D) Correlations between the overall decline in Spike-specific antibody levels as measured  
206 by flow cytometry with transduced 293T cells (as calculated using the following formula:  $1 - [\text{MFI}$   
207  $\text{at the last donation} / \text{MFI obtained at first donation}] \times 100$ ) and the number of days between  
208 symptom onset and the last donation or the number of donations by each donor. (C-D) Statistical  
209 significance was tested using a Pearson correlation test or a Spearman rank correlation test  
210 based on statistical normality.

211 **References**

- 212 1. Cheng Y, Wong R, Soo YO, Wong WS, Lee CK, Ng MH, Chan P, Wong KC, Leung CB,  
213 Cheng G. Use of convalescent plasma therapy in SARS patients in Hong Kong. *Eur J*  
214 *Clin Microbiol Infect Dis* 2005;**24**: 44-6.
- 215 2. Duan K, Liu B, Li C, Zhang H, Yu T, Qu J, Zhou M, Chen L, Meng S, Hu Y, Peng C,  
216 Yuan M, Huang J, Wang Z, Yu J, Gao X, Wang D, Yu X, Li L, Zhang J, Wu X, Li B, Xu Y,  
217 Chen W, Peng Y, Hu Y, Lin L, Liu X, Huang S, Zhou Z, Zhang L, Wang Y, Zhang Z,  
218 Deng K, Xia Z, Gong Q, Zhang W, Zheng X, Liu Y, Yang H, Zhou D, Yu D, Hou J, Shi Z,  
219 Chen S, Chen Z, Zhang X, Yang X. Effectiveness of convalescent plasma therapy in  
220 severe COVID-19 patients. *Proc Natl Acad Sci U S A* 2020;**117**: 9490-6.
- 221 3. Shen C, Wang Z, Zhao F, Yang Y, Li J, Yuan J, Wang F, Li D, Yang M, Xing L, Wei J,  
222 Xiao H, Yang Y, Qu J, Qing L, Chen L, Xu Z, Peng L, Li Y, Zheng H, Chen F, Huang K,  
223 Jiang Y, Liu D, Zhang Z, Liu Y, Liu L. Treatment of 5 Critically Ill Patients With COVID-19  
224 With Convalescent Plasma. *JAMA* 2020;**323**: 1582-9.
- 225 4. Ye M, Fu D, Ren Y, Wang F, Wang D, Zhang F, Xia X, Lv T. Treatment with  
226 convalescent plasma for COVID-19 patients in Wuhan, China. *J Med Virol* 2020.
- 227 5. Hegerova L, Gooley TA, Sweerus KA, Maree C, Bailey N, Bailey M, Dunleavy V, Patel  
228 K, Alcorn K, Haley R, Johnsen JM, Konkole BA, Lahti AC, Alexander ML, Goldman JD,  
229 Lipke A, Lim SJ, Sullivan MD, Pauk JS, Pagel JM. Use of convalescent plasma in  
230 hospitalized patients with COVID-19: case series. *Blood* 2020;**136**: 759-62.
- 231 6. Walls AC, Park YJ, Tortorici MA, Wall A, McGuire AT, Veesler D. Structure, Function,  
232 and Antigenicity of the SARS-CoV-2 Spike Glycoprotein. *Cell* 2020;**181**: 281-92 e6.
- 233 7. Hoffmann M, Kleine-Weber H, Schroeder S, Kruger N, Herrler T, Erichsen S, Schiergens  
234 TS, Herrler G, Wu NH, Nitsche A, Muller MA, Drosten C, Pohlmann S. SARS-CoV-2 Cell  
235 Entry Depends on ACE2 and TMPRSS2 and Is Blocked by a Clinically Proven Protease  
236 Inhibitor. *Cell* 2020;**181**: 271-80 e8.
- 237 8. Rojas M, Rodriguez Y, Monsalve DM, Acosta-Ampudia Y, Camacho B, Gallo JE, Rojas-  
238 Villarraga A, Ramirez-Santana C, Diaz-Coronado JC, Manrique R, Mantilla RD,  
239 Shoenfeld Y, Anaya JM. Convalescent plasma in Covid-19: Possible mechanisms of  
240 action. *Autoimmun Rev* 2020;**19**: 102554.
- 241 9. Li L, Zhang W, Hu Y, Tong X, Zheng S, Yang J, Kong Y, Ren L, Wei Q, Mei H, Hu C,  
242 Tao C, Yang R, Wang J, Yu Y, Guo Y, Wu X, Xu Z, Zeng L, Xiong N, Chen L, Wang J,  
243 Man N, Liu Y, Xu H, Deng E, Zhang X, Li C, Wang C, Su S, Zhang L, Wang J, Wu Y, Liu  
244 Z. Effect of Convalescent Plasma Therapy on Time to Clinical Improvement in Patients  
245 With Severe and Life-threatening COVID-19: A Randomized Clinical Trial. *JAMA*  
246 2020;**324**: 460-70.
- 247 10. Prévost J, Gasser R, Beaudoin-Bussièrès G, Richard J, Duerr R, Laumaea A, Anand  
248 SP, Goyette G, Benlarbi M, Ding S, Medjahed H, Lewin A, Perreault J, Tremblay T,  
249 Gendron-Lepage G, Gauthier N, Carrier M, Marcoux D, Piché A, Lavoie M, Benoit A,  
250 Loungnarath V, Brochu G, Haddad E, Stacey HD, Miller MS, Desforages M, Talbot PJ,  
251 Gould Maule GT, Côté M, Therrien C, Serhir B, Bazin R, Roger M, Finzi A. Cross-  
252 sectional evaluation of humoral responses against SARS-CoV-2 Spike. *Cell Rep Med*  
253 2020: 100126.
- 254 11. Beaudoin-Bussièrès G, Laumaea A, Anand SP, Prévost J, Gasser R, Goyette G,  
255 Medjahed H, Perreault J, Tremblay T, Lewin A, Gokool L, Morrisseau C, Bégin P,  
256 Tremblay C, Martel-Laferrrière V, Kaufmann DE, Richard J, Bazin R, Finzi A. Decline of  
257 Humoral Responses against SARS-CoV-2 Spike in Convalescent Individuals. *mBio*  
258 2020;**11**: e02590-20.
- 259 12. Robbiani DF, Gaebler C, Muecksch F, Lorenzi JCC, Wang Z, Cho A, Agudelo M, Barnes  
260 CO, Gazumyan A, Finkin S, Hagglof T, Oliveira TY, Viant C, Hurley A, Hoffmann HH,

- 261 Millard KG, Kost RG, Cipolla M, Gordon K, Bianchini F, Chen ST, Ramos V, Patel R,  
262 Dizon J, Shimeliovich I, Mendoza P, Hartwegger H, Nogueira L, Pack M, Horowitz J,  
263 Schmidt F, Weisblum Y, Michailidis E, Ashbrook AW, Waltari E, Pak JE, Huey-Tubman  
264 KE, Koranda N, Hoffman PR, West AP, Jr., Rice CM, Hatzioannou T, Bjorkman PJ,  
265 Bieniasz PD, Caskey M, Nussenzweig MC. Convergent antibody responses to SARS-  
266 CoV-2 in convalescent individuals. *Nature* 2020;**584**: 437-42.
- 267 13. Ju B, Zhang Q, Ge J, Wang R, Sun J, Ge X, Yu J, Shan S, Zhou B, Song S, Tang X, Yu  
268 J, Lan J, Yuan J, Wang H, Zhao J, Zhang S, Wang Y, Shi X, Liu L, Zhao J, Wang X,  
269 Zhang Z, Zhang L. Human neutralizing antibodies elicited by SARS-CoV-2 infection.  
270 *Nature* 2020;**584**: 115-9.
- 271 14. Rogers TF, Zhao F, Huang D, Beutler N, Burns A, He WT, Limbo O, Smith C, Song G,  
272 Woehl J, Yang L, Abbott RK, Callaghan S, Garcia E, Hurtado J, Parren M, Peng L,  
273 Ramirez S, Ricketts J, Ricciardi MJ, Rawlings SA, Wu NC, Yuan M, Smith DM,  
274 Nemazee D, Teijaro JR, Voss JE, Wilson IA, Andrabi R, Briney B, Landais E, Sok D,  
275 Jardine JG, Burton DR. Isolation of potent SARS-CoV-2 neutralizing antibodies and  
276 protection from disease in a small animal model. *Science* 2020;**369**: 956-63.
- 277 15. Liu L, Wang P, Nair MS, Yu J, Rapp M, Wang Q, Luo Y, Chan JF, Sahi V, Figueroa A,  
278 Guo XV, Cerutti G, Bimela J, Gorman J, Zhou T, Chen Z, Yuen KY, Kwong PD, Sodroski  
279 JG, Yin MT, Sheng Z, Huang Y, Shapiro L, Ho DD. Potent neutralizing antibodies  
280 against multiple epitopes on SARS-CoV-2 spike. *Nature* 2020;**584**: 450-6.
- 281 16. Shrock E, Fujimura E, Kula T, Timms RT, Lee IH, Leng Y, Robinson ML, Sie BM, Li MZ,  
282 Chen Y, Logue J, Zuiani A, McCulloch D, Lelis FJN, Henson S, Monaco DR, Travers M,  
283 Habibi S, Clarke WA, Caturegli P, Laeyendecker O, Piechocka-Trocha A, Li J, Khatri A,  
284 Chu HY, Collection MC-, Processing T, Villani AC, Kays K, Goldberg MB, Hachon N,  
285 Filbin MR, Yu XG, Walker BD, Wesemann DR, Larman HB, Lederer JA, Elledge SJ.  
286 Viral epitope profiling of COVID-19 patients reveals cross-reactivity and correlates of  
287 severity. *Science* 2020.
- 288 17. Heffron AS, McIlwain SJ, Baker DA, Amjadi MF, Khullar S, Sethi AK, Shelef MA,  
289 O'Connor DH, Ong IM. The landscape of antibody binding to SARS-CoV-2. *bioRxiv*  
290 2020: 2020.10.10.334292.
- 291 18. Perreault J, Tremblay T, Fournier MJ, Drouin M, Beaudoin-Bussi eres G, Pr evost J,  
292 Lewin A, B egin P, Finzi A, Bazin R. Waning of SARS-CoV-2 RBD antibodies in  
293 longitudinal convalescent plasma samples within four months after symptom onset.  
294 *Blood* 2020.
- 295 19. Ng KW, Faulkner N, Cornish GH, Rosa A, Harvey R, Hussain S, Ulferts R, Earl C,  
296 Wrobel A, Benton D, Roustan C, Bolland W, Thompson R, Agua-Doce A, Hobson P,  
297 Heaney J, Rickman H, Paraskevopoulou S, Houlihan CF, Thomson K, Sanchez E,  
298 Brealey D, Shin GY, Spyer MJ, Joshi D, O'Reilly N, Walker PA, Kjaer S, Riddell A,  
299 Moore C, Jebson BR, Wilkinson MGL, Marshall LR, Rosser EC, Radziszewska A,  
300 Peckham H, Ciurtin C, Wedderburn LR, Beale R, Swanton C, Gandhi S, Stockinger B,  
301 McCauley J, Gambin S, McCoy LE, Cherepanov P, Nastouli E, Kassiotis G. Pre-existing  
302 and *de novo* humoral immunity to SARS-CoV-2 in humans. *bioRxiv* 2020:  
303 2020.05.14.095414.
- 304 20. Tortorici MA, Beltramello M, Lempp FA, Pinto D, Dang HV, Rosen LE, McCallum M,  
305 Bowen J, Minola A, Jaconi S, Zatta F, De Marco A, Guarino B, Bianchi S, Lauron EJ,  
306 Tucker H, Zhou J, Peter A, Havenar-Daughton C, Wojcechowskyj JA, Case JB, Chen  
307 RE, Kaiser H, Montiel-Ruiz M, Meury M, Czudnochowski N, Spreafico R, Dillen J, Ng C,  
308 Sprugasci N, Culap K, Benigni F, Abdelnabi R, Foo SC, Schmid MA, Cameroni E, Riva  
309 A, Gabrieli A, Galli M, Pizzuto MS, Neyts J, Diamond MS, Virgin HW, Snell G, Corti D,  
310 Fink K, Veesler D. Ultrapotent human antibodies protect against SARS-CoV-2 challenge  
311 via multiple mechanisms. *Science* 2020.

- 312 21. Lapuente D, Maier C, Irrgang P, Huebner J, Peter SA, Hoffmann M, Ensser A, Ziegler K,  
313 Winkler TH, Birkholz T, Kremer AE, Steininger P, Korn K, Neipel F, Ueberla K, Tenbusch  
314 M. Rapid response flow cytometric assay for the detection of antibody responses to  
315 SARS-CoV-2. medRxiv 2020: 2020.05.09.20091447.

316

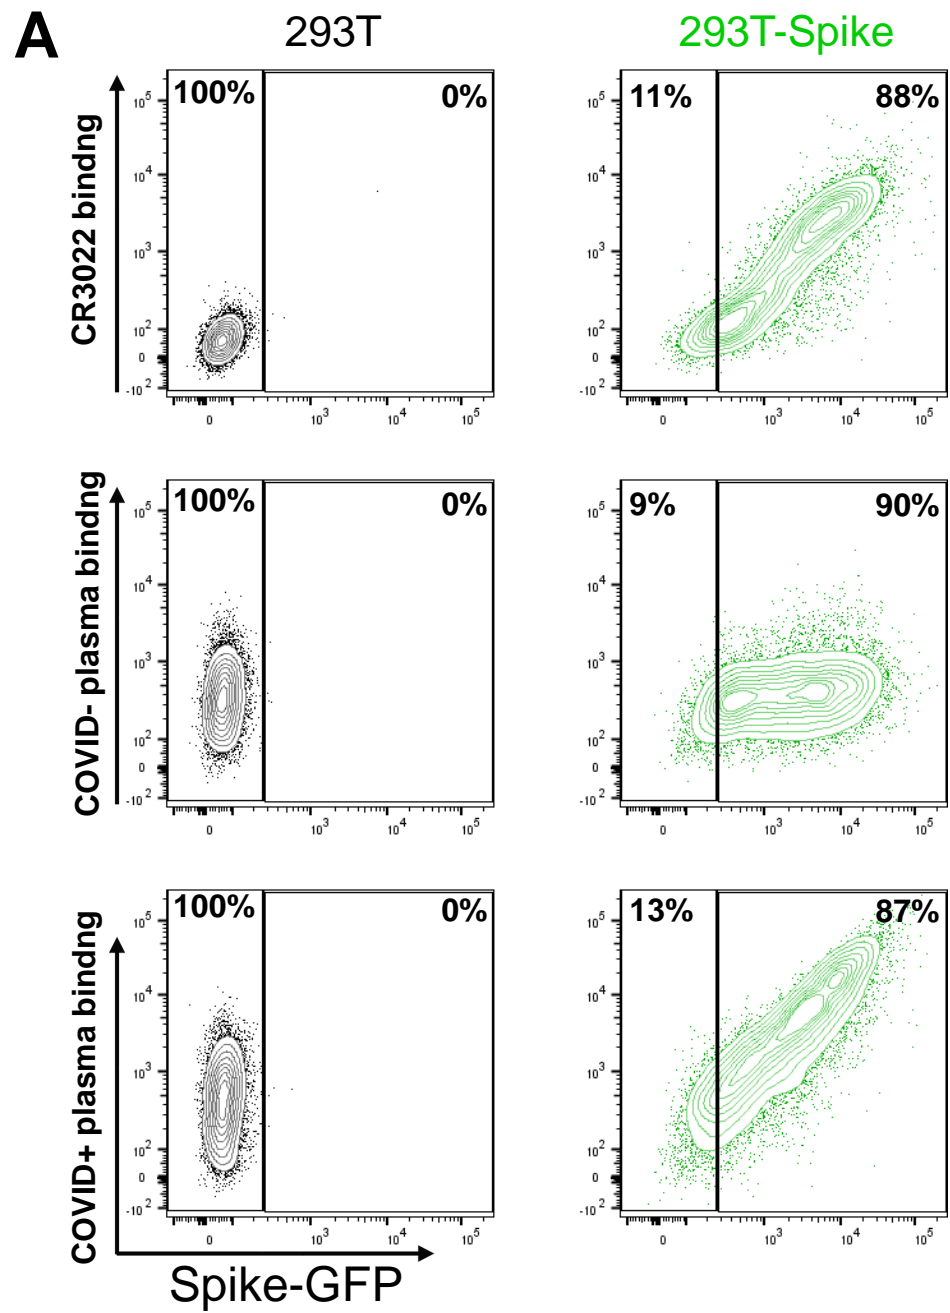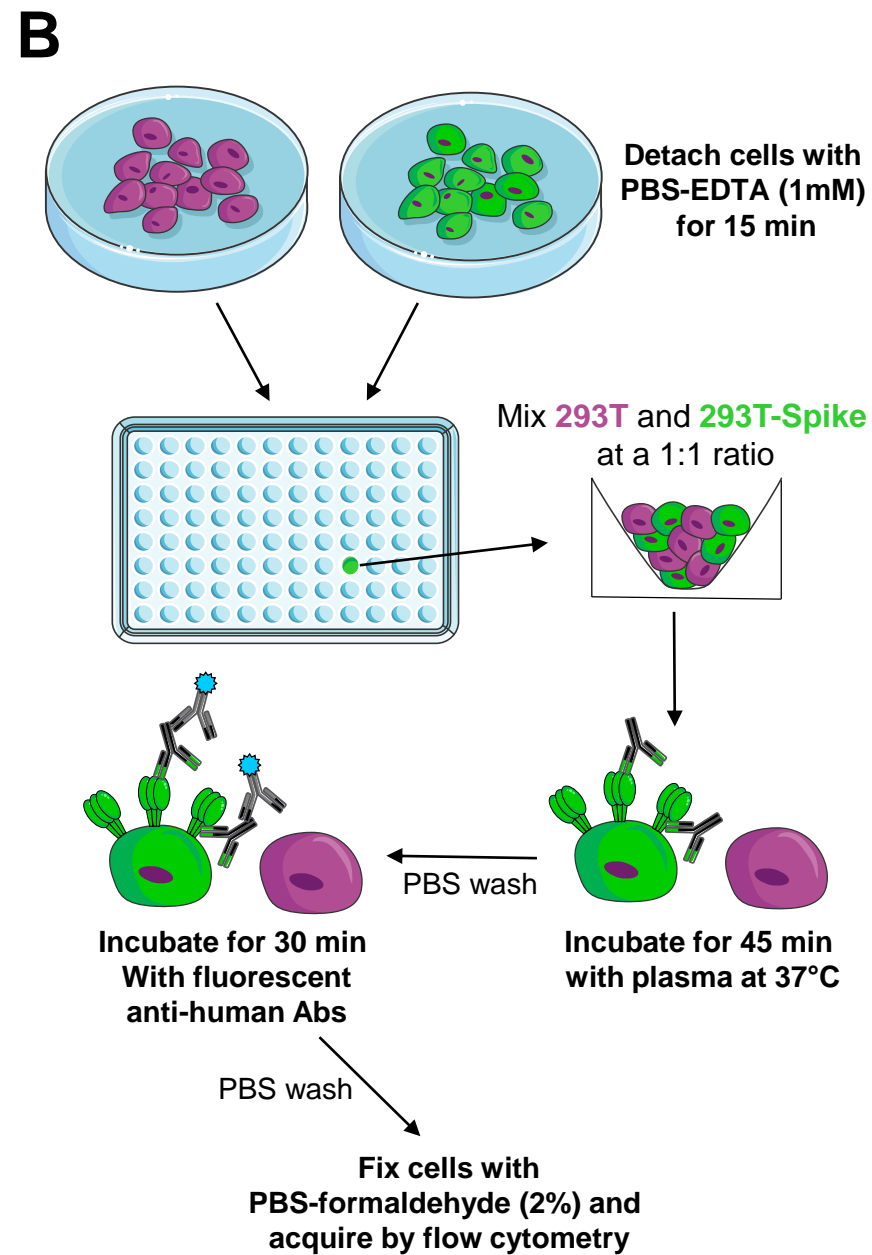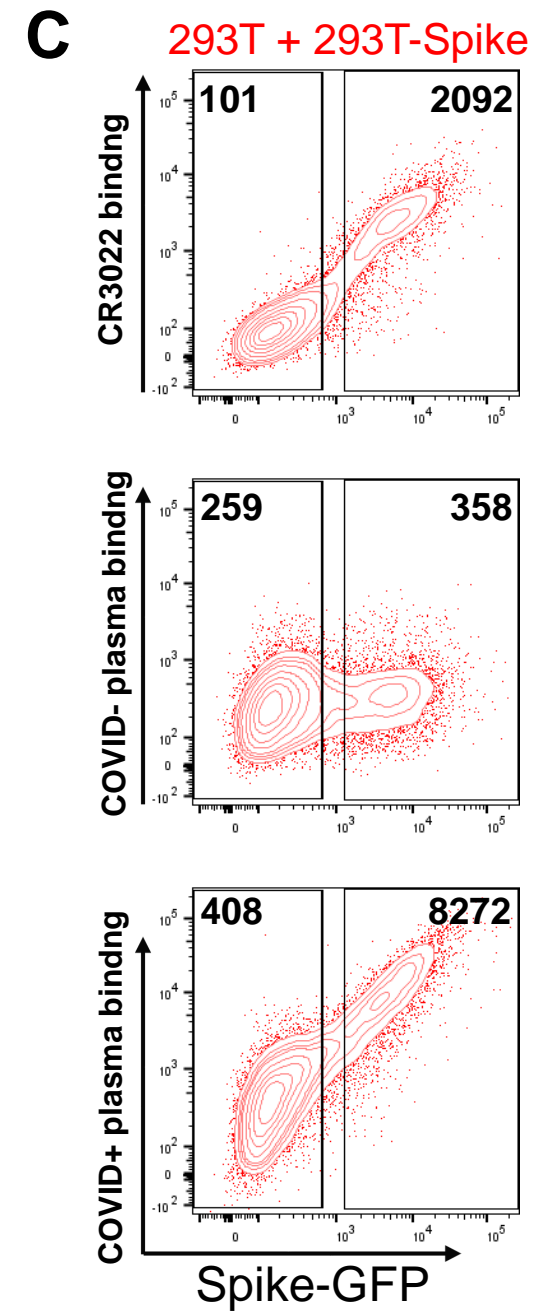

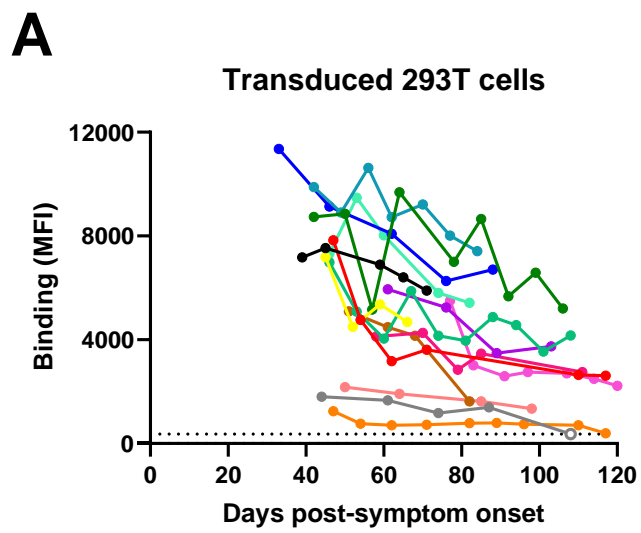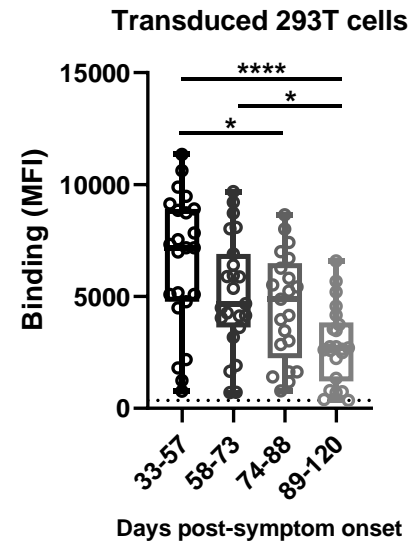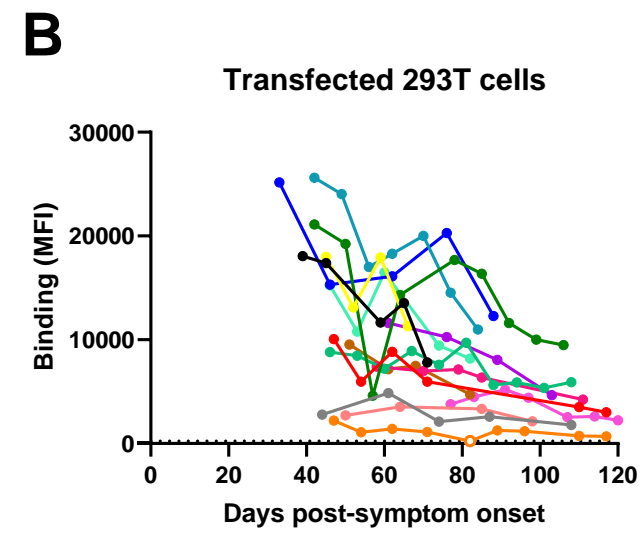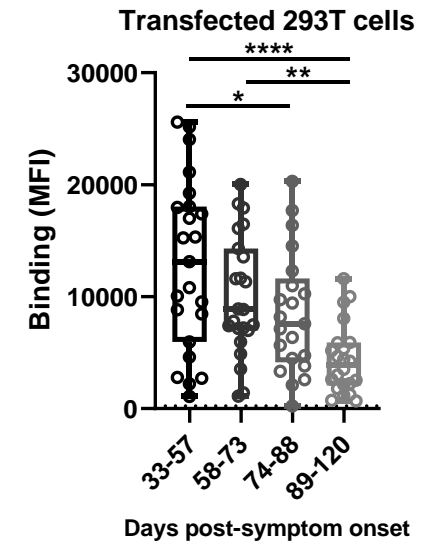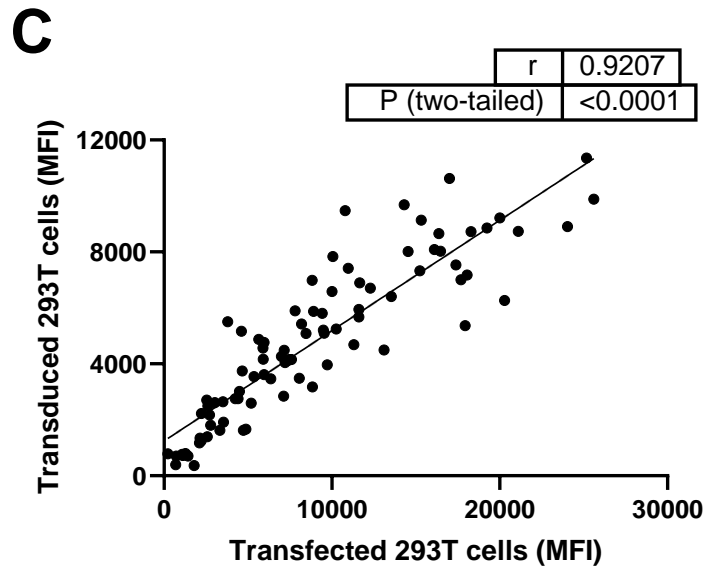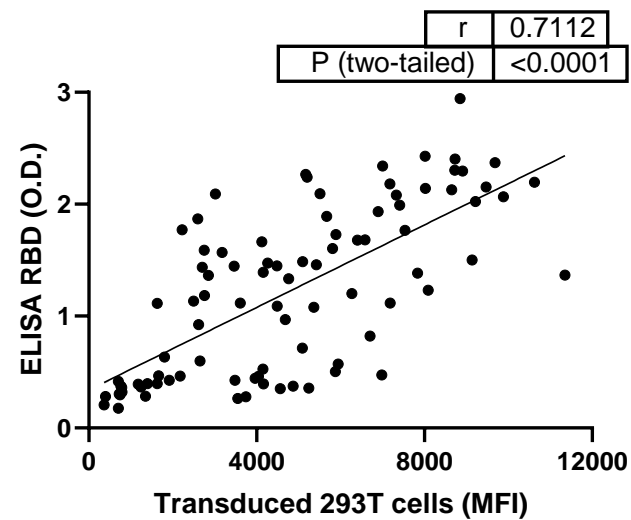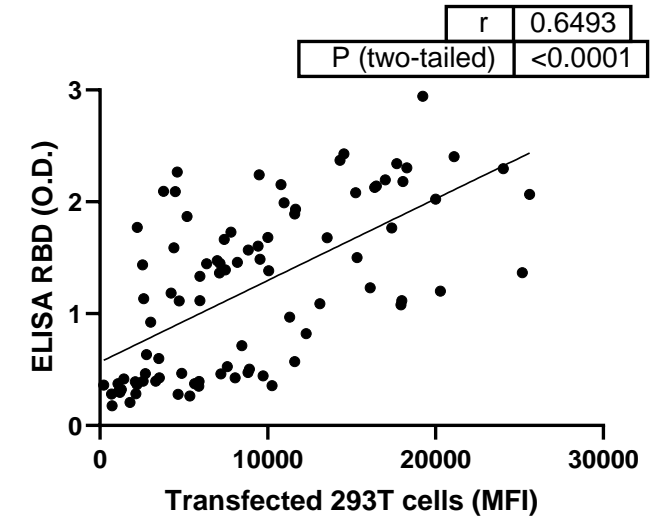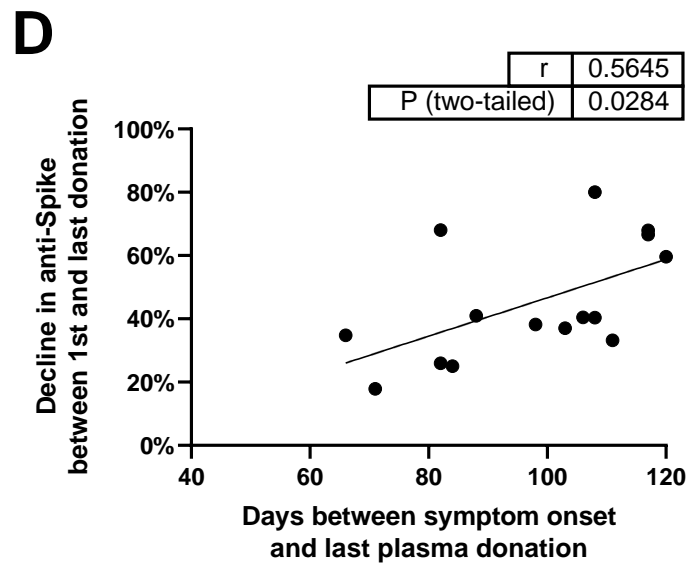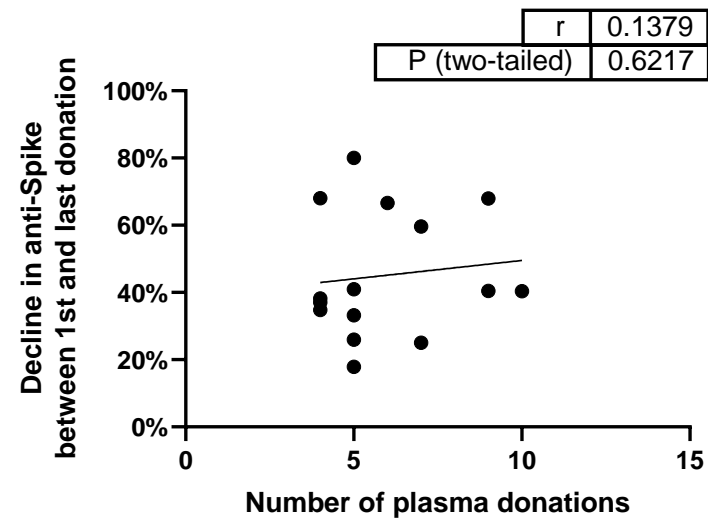

Source: https://www.biorxiv.org/content/10.1101/2020.10.20.346783v1.full.pdf
